# Supplementary material for: Risk Factors for Adhesion-Related Readmission and Abdominal Reoperation after Gynecological Surgery: A Nationwide Cohort Study
Source: MDPI journal article supplement (doi:10.3390/jcm12041351), 2023-02-08

## Supplements

# Risk Factors for Adhesion-Related Readmission and Abdominal Reoperation after Gynecological Surgery: A Nationwide Cohort Study

**Masja Toneman <sup>1,\*</sup>, Tjitske Groenvelde <sup>1</sup>, Pepijn Krielen <sup>1</sup>, Angelo Hooker <sup>2</sup>, Rudy de Wilde <sup>3</sup>, Luz Angela Torres-de la Roche <sup>3</sup>, Attilio Di Spiezio Sardo <sup>4</sup>, Philippe Koninckx <sup>5</sup>, Ying Cheong <sup>6,7</sup>, Annemiek Nap <sup>8</sup>, Harry van Goor <sup>1</sup>, Pille Pargmae <sup>8</sup> and Richard ten Broek <sup>1</sup>**

<sup>1</sup> Department of Surgery, Radboudumc, 6525 GA Nijmegen, The Netherlands

<sup>2</sup> Department of Obstetrics and Gynecology, Zaans Medical Center (ZMC), 1502 DV Zaandam, The Netherlands

<sup>3</sup> University Hospital for Gynecology, Carl von Ossietzky University, 26121 Oldenburg, Germany

<sup>4</sup> Department of Public Health, School of Medicine, University of Naples Federico II, 80131 Naples, Italy

<sup>5</sup> Department of Gynecology, Katholieke Universiteit Leuven, 3000 Leuven, Belgium

<sup>6</sup> Faculty of Medicine, University of Southampton, Southampton SO16 6YD, UK

<sup>7</sup> Complete Fertility Centre, Southampton SO16 5YA, UK

<sup>8</sup> Department of Gynecology, Radboudumc, 6525 GA Nijmegen, The Netherlands

\* Correspondence: masja.toneman@radboudumc.nl

**Table S1.** Baseline characteristics of woman undergoing baseline hysterectomy.

|                                         | Open         | Laparoscopy   | Transvaginal | Total         | Sig     |
|-----------------------------------------|--------------|---------------|--------------|---------------|---------|
| Patients                                | 5594         | 313           | 2125         | 8032          |         |
| Age                                     |              |               |              |               | P<0.001 |
| Min                                     | 15           | 14            | 25           | 14            |         |
| Max                                     | 93           | 89            | 89           | 93            |         |
| Mean                                    | 52.2 (12.04) | 51.55 (13.28) | 59.4 (12.10) | 54.07 (12.52) |         |
| Operation level                         |              |               |              |               | P<0.001 |
| Uterus                                  | 1149 (20.5%) | 120 (38.3%)   | 404 (19.0%)  | 1673 (20.8%)  |         |
| Combined gynecological                  | 2969 (53.1%) | 148 (47.3%)   | 1591 (74.9%) | 4708 (58.6%)  |         |
| Combined other                          | 1476 (26.4%) | 45 (14.4%)    | 130 (6.1%)   | 1651 (20.6%)  |         |
| Malignancy                              |              |               |              |               | P<0.001 |
| No malignancy                           | 4154 (74.3%) | 202 (64.5%)   | 2079 (97.8%) | 6435 (80.1%)  |         |
| Gynecological malignancy local          | 778 (13.9%)  | 89 (28.4%)    | 32 (1.5%)    | 899 (11.2%)   |         |
| Gyn. malignancy locally advanced        | 477 (8.5%)   | 18 (5.8%)     | 6 (0.3%)     | 501 (6.2%)    |         |
| Gyn. malignancy peritoneal metastasized | 52 (0.9%)    | 0             | 0            | 52 (0.6%)     |         |
| Malignancy other origin                 | 133 (2.4%)   | 4 (1.3%)      | 8 (0.4%)     | 145 (1.8%)    |         |
| Intra-abdominal infection               |              |               |              |               | P=0.135 |
| No                                      | 5569 (99.6%) | 313 (100%)    | 2121 (99.8%) | 8003 (99.6%)  |         |
| Yes                                     | 25 (0.4%)    | 0             | 4 (0.2%)     | 29 (0.4%)     |         |
| History of radiotherapy                 |              |               |              |               | P=0.010 |
| No                                      | 5585 (99.8%) | 311 (99.4%)   | 2125 (100%)  | 8021 (99.9%)  |         |
| Yes                                     | 9 (0.2%)     | 2 (0.6%)      | 0            | 11 (0.1%)     |         |
| Mesh placement                          |              |               |              |               | P<0.001 |
| No                                      | 5495 (98.2%) | 309 (98.7%)   | 2119 (99.7%) | 7923 (98.6%)  |         |
| Yes                                     | 99 (1.8%)    | 4 (1.3%)      | 6 (0.3%)     | 109 (1.4%)    |         |
| IBD                                     |              |               |              |               | P=0.882 |
| No                                      | 5582 (99.8%) | 312 (99.7%)   | 2121 (99.8%) | 8015 (99.8%)  |         |
| Yes                                     | 12 (0.2%)    | 1 (0.3%)      | 4 (0.2%)     | 17 (0.2%)     |         |
| Endometriosis                           |              |               |              |               | P<0.001 |
| No                                      | 4887 (87.4%) | 285 (91.1%)   | 1999 (94.1%) | 7171 (89.3%)  |         |
| Yes                                     | 707 (12.6%)  | 28 (8.9%)     | 126 (5.9%)   | 861 (10.7%)   |         |
| Adhesiolysis                            |              |               |              |               | P<0.001 |
| No                                      | 5319 (94.9%) | 300 (98.4%)   | 2122 (99.9%) | 7741 (96.4%)  |         |
| Yes                                     | 283 (5.1%)   | 5 (1.6%)      | 3 (0.1%)     | 291 (3.6%)    |         |

**Table S2:** Univariate analysis of readmission directly related to adhesions in woman who underwent index gynecological surgery

|                                                  | N/N total (%)    | HR (95% CI)           | Sig.    |
|--------------------------------------------------|------------------|-----------------------|---------|
| Approach                                         |                  |                       |         |
| Open                                             | 378/13661 (2.8%) | 2.824 (1.820-4.382)   | p<0.001 |
| Laparoscopic                                     | 85/2666 (3.2%)   | 3.266 (2.026-5.266)   |         |
| Vaginal                                          | 21/2125 (1.0%)   | Ref.                  |         |
| Malignant disease                                |                  |                       | p<0.001 |
| No malignancy                                    | 334/16455 (2.0%) | Ref.                  | p<0.001 |
| Gynecological malignancy local                   | 38/1000 (3.8%)   | 1.890 (1.351-2.644)   |         |
| Gynecological malignancy locally advanced        | 57/585 (9.7%)    | 5.029 (3.798-6.660)   |         |
| Gynecological malignancy peritoneal metastasized | 17/81 (21.0%)    | 11.576 (7.110-18.845) |         |
| Malignancy other origin                          | 38/331 (11.5%)   | 6.021 (4.304-8.421)   |         |
| Operation site                                   |                  |                       | p<0.001 |
| Ovary                                            | 65/2274 (2.9%)   | 2.261 (1.546-3.306)   | p<0.001 |
| Fallopian Tubes                                  | 24/1018 (2.4%)   | 1.854 (1.130-3.043)   |         |
| Vagina                                           | 45/3523 (1.3%)   | Ref.                  |         |
| Uterus                                           | 57/2815 (2.0%)   | 1.594 (1.078-2.356)   |         |
| Combined gynecologic                             | 105/5928 (1.8%)  | 1.394 (0.983-1.976)   |         |
| Combined other                                   | 188/2894 (6.5%)  | 5.255 (3.796-7.276)   |         |
| Fertility surgery                                |                  |                       |         |
| No                                               | 474/17607 (2.7%) | Ref.                  | P=0.009 |
| Yes                                              | 10/845 (1.2%)    | 0.436 (0.233-0.815)   |         |
| Intra-abdominal infection                        |                  |                       |         |
| No                                               | 478/18377 (2.6%) | Ref.                  | P=0.005 |
| Yes                                              | 6/75 (8.0%)      | 3.135 (1.401-7.012)   |         |
| History of radiotherapy                          |                  |                       |         |
| No                                               | 483/18434 (2.6%) | Ref.                  | P=0.486 |
| Yes                                              | 1/18 (5.6%)      | 1.934 (0.648-3.471)   |         |
| Mesh placement                                   |                  |                       |         |
| No                                               | 456/18247 (2.5%) | Ref.                  | p<0.001 |
| Yes                                              | 28/205 (13.7%)   | 5.761 (3.933-8.438)   |         |
| IBD                                              |                  |                       |         |
| No                                               | 476/18381 (2.6%) | Ref.                  | p<0.001 |
| Yes                                              | 8/71 (11.3%)     | 4.584 (2.279-9.220)   |         |
| Endometriosis                                    |                  |                       |         |
| No                                               | 436/17048 (2.6%) | Ref.                  | P=0.053 |
| Yes                                              | 48/1404 (3.4%)   | 1.341 (0.996-1.807)   |         |
| Adhesiolysis                                     |                  |                       |         |
| No                                               | 450/18047 (2.5%) | Ref.                  | p<0.001 |
| Yes                                              | 34/405 (8.4%)    | 3.484 (2.458-4.937)   |         |

**Table S3:** multivariate analysis of readmission directly related to adhesions in woman who underwent initial gynecological surgery

|                                                  | N/N total (%)    | HR (95% CI)         | Sig.    |
|--------------------------------------------------|------------------|---------------------|---------|
| Approach                                         |                  |                     | p=0.029 |
| Open                                             | 378/13661 (2.8%) | 1.854 (1.164-2.954) |         |
| Laparoscopic                                     | 85/2666 (3.2%)   | 1.952 (1.153-3.303) |         |
| Transvaginal                                     | 21/2125 (1.0%)   | Ref.                |         |
| Age                                              |                  | 1.000 (0.992-1.007) | p=0.910 |
| Malignant disease                                |                  |                     | p<0.001 |
| No malignancy                                    | 334/16455 (2.0%) | Ref.                |         |
| Gynecological malignancy local                   | 38/1000 (3.8%)   | 2.144 (1.462-3.146) |         |
| Gynecological malignancy locally advanced        | 57/585 (9.7%)    | 2.340 (1.662-3.296) |         |
| Gynecological malignancy peritoneal metastasized | 17/81 (21.0%)    | 5.950 (3.552-9.968) |         |
| Malignancy other origin                          | 38/331 (11.5%)   | 3.504 (2.410-5.095) |         |
| Operation site                                   |                  |                     | p<0.001 |
| Ovary                                            | 65/2274 (2.9%)   | 2.488 (1.569-3.944) |         |
| Fallopian Tubes                                  | 24/1018 (2.4%)   | 1.830 (1.063-3.151) |         |
| Vagina                                           | 45/3523 (1.3%)   | Ref.                |         |
| Uterus                                           | 57/2815 (2.0%)   | 1.559 (1.033-2.354) |         |
| Combined gynecologic                             | 105/5928 (1.8%)  | 1.214 (0.825-1.787) |         |
| Combined other                                   | 188/2894 (6.5%)  | 2.984 (2.063-4.315) |         |
| Fertility enhancing surgery                      |                  |                     |         |
| No                                               | 474/17607 (2.7%) | 2.663 (1.344-5.277) |         |
| Yes                                              | 10/845 (1.2%)    | Ref.                | P=0.005 |
| Intra-abdominal infection                        |                  |                     |         |
| No                                               | 478/18377 (2.6%) | Ref.                |         |
| Yes                                              | 6/75 (8.0%)      | 2.363 (1.046-5.338) | P=0.039 |
| Mesh placement                                   |                  |                     |         |
| No                                               | 456/18247 (2.5%) | Ref.                |         |
| Yes                                              | 28/205 (13.7%)   | 3.772 (2.551-5.577) | p<0.001 |
| IBD                                              |                  |                     |         |
| No                                               | 476/18381 (2.6%) | Ref.                |         |
| Yes                                              | 8/71 (11.3%)     | 2.998 (1.472-6.105) | P=0.002 |
| Endometriosis                                    |                  |                     |         |
| No                                               | 436/17048 (2.6%) | Ref.                |         |
| Yes                                              | 48/1404 (3.4%)   | 1.323 (0.970-1.803) | P=0.077 |
| Adhesiolysis                                     |                  |                     |         |
| No                                               | 450/18047 (2.5%) | Ref.                |         |
| Yes                                              | 34/405 (8.4%)    | 1.629 (1.130-2.347) | P=0.009 |

**Table S4:** Univariate analysis of readmission directly related to adhesions in woman who underwent initial hysterectomy.

|                                                  | N/N total (%)   | HR (95% CI)             | Sig.    |
|--------------------------------------------------|-----------------|-------------------------|---------|
| Approach                                         |                 |                         |         |
| Open                                             | 189/5594 (3.4%) | 3.459 (2.204-5.430)     | P<0.001 |
| Laparoscopic                                     | 10/313 (3.2%)   | 3.286 (1.548-6.978)     |         |
| Vaginal                                          | 21/2125 (1.0%)  | Ref.                    |         |
| Age                                              |                 |                         |         |
| Operation site                                   |                 |                         |         |
| Uterus                                           | 35/1673 (2.1%)  | 1.188 (0.800-1.763)     | P<0.001 |
| Combined gynecologic                             | 83/4708 (1.8%)  | Ref.                    |         |
| Combined other                                   | 102/1651 (6.2%) | 3.600 (2.695-4.860)     |         |
| Malignant disease                                |                 |                         |         |
| No malignancy                                    | 114/6435 (1.8%) | Ref.                    | P<0.001 |
| Gynecological malignancy local                   | 32/899 (3.6%)   | 2.025 (1.368-2.997)     |         |
| Gynecological malignancy locally advanced        | 48/501 (9.6%)   | 5.639 (4.025-7.901)     |         |
| Gynecological malignancy peritoneal metastasized | 8/52 (15.4%)    | 9.229 (4.506-18.901)    |         |
| Malignancy other origin                          | 18/145 (12.4%)  | 7.511 (4.569-12.348)    |         |
| Intra-abdominal infection                        |                 |                         |         |
| No                                               | 217/8003 (2.7%) | Ref.                    | P=0.019 |
| Yes                                              | 3/29 (10.3%)    | 3.904 (1.249-12.199)    |         |
| History of radiotherapy                          |                 |                         |         |
| No                                               | 219/8021 (2.7%) | Ref.                    | P=0.205 |
| Yes                                              | 1/11 (9.1%)     | 3.566 (0.500-25.431)    |         |
| Mesh placement                                   |                 |                         |         |
| No                                               | 205/7923 (2.6%) | Ref.                    | P<0.001 |
| Yes                                              | 15/109 (13.8%)  | 5.595 (3.312 -9.452)    |         |
| IBD                                              |                 |                         |         |
| No                                               | 220/8015 (2.7%) | Ref.                    | P=0.645 |
| Yes                                              | 0/17 (0.0%)     | 0.050 (0.000-17840.829) |         |
| Endometriosis                                    |                 |                         |         |
| No                                               | 205/7171 (2.9%) | Ref.                    | P=0.060 |
| Yes                                              | 15/861 (1.7%)   | 0.605 (0.358-1.022)     |         |
| Adhesiolysis                                     |                 |                         |         |
| No                                               | 202/7741 (2.6%) | Ref.                    | P<0.001 |
| Yes                                              | 18/291 (6.2%)   | 2.405 (1.485-3.894)     |         |

**Table S5:** multivariate analysis of readmission directly related to adhesions in woman who underwent initial hysterectomy.

|                                                  | N/N total (%)   | HR (95% CI)          | Sig.    |
|--------------------------------------------------|-----------------|----------------------|---------|
| Approach                                         |                 |                      | P=0.017 |
| Open                                             | 189/5594 (3.4%) | 2.043 (1.249-3.343)  |         |
| Laparoscopic                                     | 10/313 (3.2%)   | 2.109 (0.961-4.628)  |         |
| Transvaginal                                     | 21/2125 (1.0%)  | Ref.                 |         |
| Age                                              |                 | 1.002 (0.990-1.015)  | P=0.711 |
| Malignant disease                                |                 |                      | P<0.001 |
| No malignancy                                    | 114/6435 (1.8%) | Ref.                 |         |
| Gynecological malignancy local                   | 32/899 (3.6%)   | 1.885 (1.201-2.958)  |         |
| Gynecological malignancy locally advanced        | 48/501 (9.6%)   | 2.809 (1.775-4.445)  |         |
| Gynecological malignancy peritoneal metastasized | 8/52 (15.4%)    | 5.005 (2.313-10.829) |         |
| Malignancy other origin                          | 18/145 (12.4%)  | 4.248 (2.395-7.535)  |         |
| Operation site                                   |                 |                      | P=0.025 |
| Uterus                                           | 35/1673 (2.1%)  | 1.305 (0.0851-2.001) |         |
| Combined gynecological                           | 83/4708 (1.8%)  | Ref.                 |         |
| Combined other                                   | 102/1651 (6.2%) | 1.805 (1.171-2.780)  |         |
| Intra-abdominal infection                        |                 |                      |         |
| No                                               | 217/8003 (2.7%) | Ref.                 |         |
| Yes                                              | 3/29 (10.3%)    | 2.324 (0.716-7.548)  | P=0.160 |
| Mesh placement                                   |                 |                      |         |
| No                                               | 205/7923 (2.6%) | Ref.                 |         |
| Yes                                              | 15/109 (13.8%)  | 3.665 (2.126-6.317)  | P<0.001 |
| Endometriosis                                    |                 |                      |         |
| No                                               | 205/7171 (2.9%) | Ref.                 |         |
| Yes                                              | 15/861 (1.7%)   | 0.731 (0.427-1.251)  | P=0.253 |
| Adhesiolysis                                     |                 |                      |         |
| No                                               | 202/7741 (2.6%) | Ref.                 |         |
| Yes                                              | 18/291 (6.2%)   | 1.201 (0.729-1.978)  | P=0.472 |

**Table S6:** Univariate analysis of risk for readmissions possibly related to adhesions in woman after gynecological surgery.

|                                                  | N/N total (%)      | HR (95% CI)          | Sig.    |
|--------------------------------------------------|--------------------|----------------------|---------|
| Approach                                         |                    |                      |         |
| Open                                             | 2003/13661 (14.7%) | 1.510 (1.310-1.739)  | p<0.001 |
| Laparoscopic                                     | 504/2666 (18.9%)   | 2.022 (1.722-2.374)  |         |
| Vaginal                                          | 212/2125 (10.0%)   | Ref.                 |         |
| Malignant disease                                |                    |                      |         |
| No malignancy                                    | 2303/16455 (14.0%) | Ref.                 | P<0.001 |
| Gynecological malignancy local                   | 141/1000 (14.1%)   | 1.006 (0.848-1.192)  |         |
| Gynecological malignancy locally advanced        | 148/585 (25.3%)    | 1.961 (1.660-2.315)  |         |
| Gynecological malignancy peritoneal metastasized | 38/81 (46.9%)      | 4.316 (3.132-5.948)  |         |
| Malignancy other origin                          | 89/331 (26.9%)     | 2.128 (1.722-2.630)  |         |
| Operation site                                   |                    |                      |         |
| Ovary                                            | 420/2274 (18.5%)   | 1.621 (1.372-1.914)  | P<0.001 |
| Fallopian Tubes                                  | 202/1018 (19.8%)   | 1.445 (1.187-1.761)  |         |
| Vagina                                           | 388/3523 (11.0%)   | Ref.                 |         |
| Uterus                                           | 413/2815 (14.7%)   | 1.190 (1.025-1.381)  |         |
| Combined gynecologic                             | 729/5928 (12.3%)   | 1.074 (0.937-1.231)  |         |
| Combined other                                   | 567/2894 (19.6%)   | 1.375 (1.186-1.595)  |         |
| Fertility surgery                                |                    |                      |         |
| No                                               | 2626/17607 (14.9%) | Ref.                 | p=0.003 |
| Yes                                              | 93/845 (11.0%)     | 0.728 (0.592-0.896)  |         |
| Intra-abdominal infection                        |                    |                      |         |
| No                                               | 2692/18377 (14.6%) | Ref.                 | p<0.001 |
| Yes                                              | 27/75 (36.0%)      | 2.538 (1.734-3.716)  |         |
| History of radiotherapy                          |                    |                      |         |
| No                                               | 2707/18434 (14.7%) | Ref.                 | p<0.001 |
| Yes                                              | 12/18 (66.7%)      | 6.512 (3.671-11.552) |         |
| Mesh placement                                   |                    |                      |         |
| No                                               | 2650/18247 (14.5%) | Ref.                 | p<0.001 |
| Yes                                              | 69/205 (33.7%)     | 2.186 (1.717-2.783)  |         |
| IBD                                              |                    |                      |         |
| No                                               | 2690/18381 (14.6%) | Ref.                 | p<0.001 |
| Yes                                              | 29/71 (40.8%)      | 2.716 (1.876-3.931)  |         |
| Endometriosis                                    |                    |                      |         |
| No                                               | 2504/17048 (14.7%) | Ref.                 | p=0.548 |
| Yes                                              | 215/1404 (15.3%)   | 1.044 (0.908-1.200)  |         |
| Adhesiolysis                                     |                    |                      |         |
| No                                               | 2648/18047 (14.7%) | Ref.                 | P=0.093 |
| Yes                                              | 71/405 (17.5%)     | 1.224 (0.967-1.549)  |         |

**Table S7:** Multivariate analysis of risk for readmissions possibly related to adhesions in woman after gynecological surgery.

|                                                  | N/N total (%)      | HR (95% CI)          | Sig.    |
|--------------------------------------------------|--------------------|----------------------|---------|
| Approach                                         |                    |                      |         |
| Open                                             | 2003/13661 (14.7%) | 1.212 (1.039-1.415)  | P=0.009 |
| Laparoscopic                                     | 504/2666 (18.9%)   | 1.249 (1.039-1.501)  |         |
| Transvaginal                                     | 212/2125 (10.0%)   | Ref.                 |         |
| Age                                              |                    | 0.988 (0.985-0.991)  | p<0.001 |
| Malignant disease                                |                    |                      |         |
| No malignancy                                    | 2303/16455 (14.0%) | Ref.                 | P<0.001 |
| Gynecological malignancy local                   | 141/1000 (14.1%)   | 1.163 (0.967-1.399)  |         |
| Gynecological malignancy locally advanced        | 148/585 (25.3%)    | 1.843 (1.516-2.242)  |         |
| Gynecological malignancy peritoneal metastasized | 38/81 (46.9%)      | 4.228 (3.031-5.898)  |         |
| Malignancy other origin                          | 89/331 (26.9%)     | 2.135 (1.708-2.670)  |         |
| Operation site                                   |                    |                      |         |
| Ovary                                            | 420/2274 (18.5%)   | 1.563 (1.307-1.870)  | P<0.001 |
| Fallopian Tubes                                  | 202/1018 (19.8%)   | 1.374 (1.129-1.671)  |         |
| Vagina                                           | 388/3523 (11.0%)   | Ref.                 |         |
| Uterus                                           | 413/2815 (14.7%)   | 1.180 (1.017-1.370)  |         |
| Combined gynecological                           | 729/5928 (12.3%)   | 1.063 (0.919-1.208)  |         |
| Combined other                                   | 567/2894 (19.6%)   | 1.361 (1.172-1.580)  |         |
| Fertility enhancing surgery                      |                    |                      |         |
| No                                               | 2626/17607 (14.9%) | 2.045 (1.618-2.586)  | p<0.001 |
| Yes                                              | 93/845 (11.0%)     | Ref.                 |         |
| Intra-abdominal infection                        |                    |                      |         |
| No                                               | 2692/18377 (14.6%) | Ref.                 | p<0.001 |
| Yes                                              | 27/75 (36.0%)      | 2.521 (1.721-3.690)  |         |
| History of radiotherapy                          |                    |                      |         |
| No                                               | 2707/18434 (14.7%) | Ref.                 | p<0.001 |
| Yes                                              | 12/18 (66.7%)      | 6.564 (3.699-11.646) |         |
| Mesh placement                                   |                    |                      |         |
| No                                               | 2650/18247 (14.5%) | Ref.                 | p<0.001 |
| Yes                                              | 69/205 (33.7%)     | 2.193 (1.723-2.793)  |         |
| IBD                                              |                    |                      |         |
| No                                               | 2690/18381 (14.6%) | Ref.                 | p<0.001 |
| Yes                                              | 29/71 (40.8%)      | 2.716 (1.876-3.932)  |         |
| Adhesiolysis                                     |                    |                      |         |
| No                                               | 2648/18047 (14.7%) | Ref.                 | p=0.768 |
| Yes                                              | 71/405 (17.5%)     | 0.964 (0.755-1.230)  |         |



**Table S8:** Univariate analysis of risk for readmission possibly related to adhesions in woman undergoing initial hysterectomy.

|                                                  | N/N total (%)     | HR (95% CI)          | Sig.    |
|--------------------------------------------------|-------------------|----------------------|---------|
| Approach                                         |                   |                      |         |
| Open                                             | 837/5594 (15.0%)  | 1.545 (1.329-1.796)  | P<0.001 |
| Laparoscopic                                     | 42/313 (13.4%)    | 1.391 (0.999-1.937)  |         |
| Vaginal                                          | 212/2125 (10%)    | Ref.                 |         |
| Age                                              |                   |                      |         |
| Operation site                                   |                   |                      |         |
| Uterus                                           | 250/1673 (14.9%)  | 1.300 (1.120-1.510)  | P<0.001 |
| Combined gynecologic                             | 552/4708 (11.7%)  | Ref.                 |         |
| Combined other                                   | 289/1651 (17.5%)  | 1.558 (1.351-1.796)  |         |
| Malignant disease                                |                   |                      |         |
| No malignancy                                    | 793/6435 (12.3%)  | Ref.                 | P<0.001 |
| Gynecological malignancy local                   | 116/899 (12.9%)   | 1.046 (0.861-1.271)  |         |
| Gynecological malignancy locally advanced        | 117/501 (23.4%)   | 2.047 (1.686-2.486)  |         |
| Gynecological malignancy peritoneal metastasized | 22/52 (42.3%)     | 4.095 (2.681-6.255)  |         |
| Malignancy other origin                          | 43/145 (29.7%)    | 2.755 (2.027-3.744)  |         |
| Intra-abdominal infection                        |                   |                      |         |
| No                                               | 1078/8003 (13.5%) | Ref.                 | P<0.001 |
| Yes                                              | 13/29 (44.8%)     | 4.043 (2.340-6.987)  |         |
| History of radiotherapy                          |                   |                      |         |
| No                                               | 1083/8021 (13.5%) | Ref.                 | P<0.001 |
| Yes                                              | 8/11 (72.7%)      | 9.642 (4.807-19.342) |         |
| Mesh placement                                   |                   |                      |         |
| No                                               | 1060/7923 (13.4%) | Ref.                 | P<0.001 |
| Yes                                              | 31/109 (28.4%)    | 2.288 (1.601-3.270)  |         |
| IBD                                              |                   |                      |         |
| No                                               | 1088/8015 (13.6%) | Ref.                 | P=0.568 |
| Yes                                              | 3/17 (17.6%)      | 1.391 (0.448-4.320)  |         |
| Endometriosis                                    |                   |                      |         |
| No                                               | 980/7171 (13.7%)  | Ref.                 | P=0.500 |
| Yes                                              | 111/861 (12.9%)   | 0.935 (0.768-1.137)  |         |
| Adhesiolysis                                     |                   |                      |         |
| No                                               | 1045/7741 (13.5%) | Ref.                 | P=0.255 |
| Yes                                              | 46/291 (15.8%)    | 1.187 (0.884-1.595)  |         |

**Table S9:** Multivariate analysis of risk for readmission possibly related to adhesions in woman undergoing initial hysterectomy.

|                                                  | N/N total (%)     | HR (95% CI)          | Sig.    |
|--------------------------------------------------|-------------------|----------------------|---------|
| Approach                                         |                   |                      |         |
| Open                                             | 837/5594 (15.0%)  | 1.183 (1.001-1.399)  | P=0.129 |
| Laparoscopic                                     | 42/313 (13.4%)    | 1.072 (0.760-1.511)  |         |
| Transvaginal                                     | 212/2125 (10%)    | Ref.                 |         |
| Age                                              |                   | 0.987 (0.981-0.993)  | P<0.001 |
| Operation site                                   |                   |                      |         |
| Uterus                                           | 250/1673 (14.9%)  | 1.149 (0.916-1.441)  | P=0.228 |
| Combined gynecological                           | 552/4708 (11.7%)  | 1.002 (0.822-1.220)  |         |
| Combined other                                   | 289/1651 (17.5%)  | Ref.                 |         |
| Malignant disease                                |                   |                      |         |
| No malignancy                                    | 793/6435 (12.3%)  | Ref.                 | P<0.001 |
| Gynecological malignancy local                   | 116/899 (12.9%)   | 1.112 (0.900-1.375)  |         |
| Gynecological malignancy locally advanced        | 117/501 (23.4%)   | 2.274 (1.761-2.937)  |         |
| Gynecological malignancy peritoneal metastasized | 22/52 (42.3%)     | 4.577 (2.918-7.180)  |         |
| Malignancy other origin                          | 43/145 (29.7%)    | 3.251 (2.327-4.541)  |         |
| Intra-abdominal infection                        |                   |                      |         |
| No                                               | 1078/8003 (13.5%) | Ref.                 | P<0.001 |
| Yes                                              | 13/29 (44.8%)     | 3.712 (2.142-6.432)  |         |
| History of radiotherapy                          |                   |                      |         |
| No                                               | 1083/8021 (13.5%) | Ref.                 | P<0.001 |
| Yes                                              | 8.11 (72.7%)      | 9.776 (4.847-19.718) |         |
| Mesh placement                                   |                   |                      |         |
| No                                               | 1060/7923 (13.4%) | Ref.                 | P=0.001 |
| Yes                                              | 31/109 (28.4%)    | 1.898 (1.322-2.725)  |         |

**Table S10:** Univariate analysis of reoperation in woman who underwent initial gynecological surgery.

|                                                  | N/N total (%)      | HR (95% CI)         | Sig.    |
|--------------------------------------------------|--------------------|---------------------|---------|
| Approach                                         |                    |                     | P=0.713 |
| Open                                             | 1993/13661 (14.6%) | 1.052 (0.931-1.187) |         |
| Laparoscopic                                     | 386/2666 (11.3%)   | 1.038 (0.892-1.207) |         |
| Vaginal                                          | 300/2125 (14.1%)   | Ref.                |         |
| Malignant disease                                |                    |                     | P=0.009 |
| No malignancy                                    | 2436/16455 (14.8%) | Ref.                |         |
| Gynecological malignancy local                   | 109/1000 (10.9%)   | 0.730 (0.602-0.884) |         |
| Gynecological malignancy locally advanced        | 72/585 (12.3%)     | 0.815 (0.645-1.030) |         |
| Gynecological malignancy peritoneal metastasized | 10/81 (12.3%)      | 0.849 (0.456-1.581) |         |
| Malignancy other origin                          | 52/331 (15.7%)     | 1.084 (0.823-1.426) |         |
| Operation site                                   |                    |                     | p<0.001 |
| Ovary                                            | 582/2274 (25.6%)   | 3.690 (2.928-4.650) |         |
| Fallopian Tubes                                  | 82/1018 (8.1%)     | Ref.                |         |
| Vagina                                           | 611/3523 (17.3%)   | 2.263 (1.797-2.850) |         |
| Uterus                                           | 394/2815 (14.0%)   | 1.813 (1.429-2.300) |         |
| Combined gynecologic                             | 619/5928 (10.4%)   | 1.316 (1.045-1.657) |         |
| Combined other                                   | 391/2894 (13.5%)   | 1.741 (1.372-2.209) |         |
| Fertility surgery                                |                    |                     | p<0.001 |
| No                                               | 2355/17607 (13.4%) | Ref.                |         |
| Yes                                              | 324/845 (38.3%)    | 3.810 (3.392-4.279) |         |
| Intra-abdominal infection                        |                    |                     | p<0.001 |
| No                                               | 2624/18377 (14.3%) | Ref.                |         |
| Yes                                              | 55/75 (73.3%)      | 6.335 (4.849-8.275) |         |
| History of radiotherapy                          |                    |                     | P=0.108 |
| No                                               | 2674/18434 (14.5%) | Ref.                |         |
| Yes                                              | 5/18 (27.8%)       | 2.053 (0.854-4.935) |         |
| Mesh placement                                   |                    |                     | p<0.001 |
| No                                               | 2521/18247 (13.8%) | Ref.                |         |
| Yes                                              | 158/205 (77.1%)    | 7.981 (6.792-9.377) |         |
| IBD                                              |                    |                     | p<0.001 |
| No                                               | 2657/18381 (14.5%) | Ref.                |         |
| Yes                                              | 22/71 (31.0%)      | 2.293 (1.507-3.489) |         |
| Endometriosis                                    |                    |                     | P=0.476 |
| No                                               | 2481/17048 (14.6%) | Ref.                |         |
| Yes                                              | 198/1404 (14.1%)   | 0.949 (0.821-1.096) |         |
| Adhesiolysis                                     |                    |                     | P=0.004 |
| No                                               | 2641/18047 (14.6%) | Ref.                |         |
| Yes                                              | 38/405 (9.4%)      | 0.627 (0.455-0.863) |         |

**Table S11:** multivariate analysis of reoperation in woman who underwent initial gynecological surgery.

|                                                  | N/N total (%)      | HR (95% CI)          | Sig.    |
|--------------------------------------------------|--------------------|----------------------|---------|
| Approach                                         |                    |                      |         |
| Open                                             | 1993/13661 (14.6%) |                      |         |
| Laparoscopic                                     | 386/2666 (11.3%)   |                      |         |
| Transvaginal                                     | 300/2125 (14.1%)   |                      |         |
| Age                                              |                    | 0.997 (0.994-1.000)  | P=0.071 |
| Malignant disease                                |                    |                      |         |
| No malignancy                                    | 2436/16455 (14.8%) | Ref.                 | P=0.182 |
| Gynecological malignancy local                   | 109/1000 (10.9%)   | 0.991 (0.809-1.213)  |         |
| Gynecological malignancy locally advanced        | 72/585 (12.3%)     | 0.915 (0.705-1.186)  |         |
| Gynecological malignancy peritoneal metastasized | 10/81 (12.3%)      | 1.035 (0.552-1.940)  |         |
| Malignancy other origin                          | 52/331 (15.7%)     | 1.289 (0.968-1.718)  |         |
| Operation site                                   |                    |                      | p<0.001 |
| Ovary                                            | 582/2274 (25.6%)   | 2.496 (1.958-3.182)  |         |
| Fallopian Tubes                                  | 82/1018 (8.1%)     | Ref.                 |         |
| Vagina                                           | 611/3523 (17.3%)   | 2.474 (1.929-3.172)  |         |
| Uterus                                           | 394/2815 (14.0%)   | 1.901 (1.492-2.422)  |         |
| Combined gynecologic                             | 619/5928 (10.4%)   | 1.374 (1.079-1.749)  |         |
| Combined other                                   | 391/2894 (13.5%)   | 1.629 (1.262-2.104)  |         |
| Fertility enhancing surgery                      |                    |                      |         |
| No                                               | 2355/17607 (13.4%) | Ref.                 |         |
| Yes                                              | 324/845 (38.3%)    | 2.889 (2.478-3.367)  | p<0.001 |
| Intra-abdominal infection                        |                    |                      |         |
| No                                               | 2624/18377 (14.3%) | Ref.                 |         |
| Yes                                              | 55/75 (73.3%)      | 5.089 (3.886-6.665)  | p<0.001 |
| History of radiotherapy                          |                    |                      |         |
| No                                               | 2674/18434 (14.5%) | Ref.                 |         |
| Yes                                              | 5/18 (27.8%)       | 2.684 (1.111-6.482)  | P=0.028 |
| Mesh placement                                   |                    |                      |         |
| No                                               | 2521/18247 (13.8%) | Ref.                 |         |
| Yes                                              | 158/205 (77.1%)    | 8.848 (7.494-10.446) | p<0.001 |
| IBD                                              |                    |                      |         |
| No                                               | 2657/18381 (14.5%) | Ref.                 |         |
| Yes                                              | 22/71 (31.0%)      | 1.645 (1.077-2.512)  | P=0.020 |
| Adhesiolysis                                     |                    |                      |         |
| No                                               | 2641/18047 (14.6%) | Ref.                 |         |
| Yes                                              | 38/405 (9.4%)      | 0.813 (0.621-1.067)  | P=0.137 |

**Table S12:** Univariate analysis of reoperation in woman who underwent initial hysterectomy.

|                                                  | N/N total (%)    | HR (95% CI)           | Sig.    |
|--------------------------------------------------|------------------|-----------------------|---------|
| Approach                                         |                  |                       |         |
| Open                                             | 487/5594 (8.7%)  | 1.098 (0.735-1.641)   | P<0.001 |
| Laparoscopic                                     | 25/313 (8.0%)    | Ref.                  |         |
| Vaginal                                          | 300/2125 (14.1%) | 1.833 (1.219-2.757)   |         |
| Age                                              |                  |                       |         |
| Operation site                                   |                  |                       |         |
| Uterus                                           | 170/1673 (10.2%) | 1.030 (0.864-1.227)   | P=0.572 |
| Combined gynecologic                             | 465/4708 (9.9%)  | Ref.                  |         |
| Combined other                                   | 177/1651 (10.7%) | 1.098 (0.923-1.305)   |         |
| Malignant disease                                |                  |                       |         |
| No malignancy                                    | 665/6435 (10.3%) | Ref.                  | P=0.015 |
| Gynecological malignancy local                   | 67/899 (7.5%)    | 0.709 (0.552-0.912)   |         |
| Gynecological malignancy locally advanced        | 56/501 (11.2%)   | 1.082 (0.824-1.421)   |         |
| Gynecological malignancy peritoneal metastasized | 3/52 (3.9%)      | 0.549 (0.177 -1.706)  |         |
| Malignancy other origin                          | 21/145 (14.5%)   | 1.472 (0.953-2.273)   |         |
| Intra-abdominal infection                        |                  |                       |         |
| No                                               | 792/8003 (9.9%)  | Ref.                  | P<0.001 |
| Yes                                              | 20/29 (69.0%)    | 9.320 (5.978-14.531)  |         |
| History of radiotherapy                          |                  |                       |         |
| No                                               | 808/8021 (10.1%) | Ref.                  | P=0.004 |
| Yes                                              | 4/11 (36.4%)     | 4.310 (1.614-11.511)  |         |
| Mesh placement                                   |                  |                       |         |
| No                                               | 731/7923 (9.2%)  | Ref.                  | P<0.001 |
| Yes                                              | 81/109 (74.3%)   | 12.158 (9.653-15.313) |         |
| IBD                                              |                  |                       |         |
| No                                               | 807/8015 (10.7%) | Ref.                  | P=0.009 |
| Yes                                              | 5/17 (29.4%)     | 3.221 (1.337-7.759)   |         |
| Endometriosis                                    |                  |                       |         |
| No                                               | 725/7171 (10.1%) | Ref.                  | P=0.923 |
| Yes                                              | 87/861 (10.1%)   | 0.989 (0.792-1.235)   |         |
| Adhesiolysis                                     |                  |                       |         |
| No                                               | 791/7741 (10.2%) | Ref.                  | P=0.103 |
| Yes                                              | 21/291 (7.2%)    | 0.697 (0.452-1.076)   |         |

**Table S13:** multivariate analysis of reoperation in woman who underwent initial hysterectomy.

|                                                  | N/N total (%)    | HR (95% CI)            | Sig.    |
|--------------------------------------------------|------------------|------------------------|---------|
| Approach                                         |                  |                        |         |
| Open                                             | 487/5594 (8.7%)  | 1.006 (0.670-1.590)    | p<0.001 |
| Laparoscopic                                     | 25/313 (8.0%)    | Ref.                   |         |
| Transvaginal                                     | 300/2125 (14.1%) | 2.199 (1.443-3.352)    |         |
| Age                                              |                  | 0.987 (0.981-0.994)    | p<0.001 |
| Operation site                                   |                  |                        |         |
| Uterus                                           | 170/1673 (10.2%) | 0.984 (0.815-1.188)    | P=0.626 |
| Combined gynecologic                             | 465/4708 (9.9%)  | Ref.                   |         |
| Combined other                                   | 177/1651 (10.7%) | 1.108 (0.887-1.385)    |         |
| Malignant disease                                |                  |                        |         |
| No malignancy                                    | 665/6435 (10.3%) | Ref.                   | P=0.224 |
| Gynecological malignancy local                   | 67/899 (7.5%)    | 0.961 (0.733-1.260)    |         |
| Gynecological malignancy locally advanced        | 56/501 (11.2%)   | 1.189 (0.855-1.653)    |         |
| Gynecological malignancy peritoneal metastasized | 3/52 (3.9%)      | 0.657 (0.209-2.068)    |         |
| Malignancy other origin                          | 21/145 (14.5%)   | 1.659 (1.032-2.667)    |         |
| Intra-abdominal infection                        |                  |                        |         |
| No                                               | 792/8003 (9.9%)  | Ref.                   | p<0.001 |
| Yes                                              | 20/29 (69.0%)    | 7.277 (4.622-11.456)   |         |
| History of radiotherapy                          |                  |                        |         |
| No                                               | 808/8021 (10.1%) | Ref.                   | p<0.001 |
| Yes                                              | 4/11 (36.4%)     | 6.486 (2.408-17.471)   |         |
| Mesh placement                                   |                  |                        |         |
| No                                               | 731/7923 (9.2%)  | Ref.                   | P<0.001 |
| Yes                                              | 81/109 (74.3%)   | 13.148 (10.311-16.765) |         |
| IBD                                              |                  |                        |         |
| No                                               | 807/8015 (10.7%) | Ref.                   | P=0.248 |
| Yes                                              | 5/17 (29.4%)     | 1.711 (0.688-4.255)    |         |

**Figure S1:** Nomogram to predict readmission directly related to adhesions in woman who underwent initial hysterectomy.

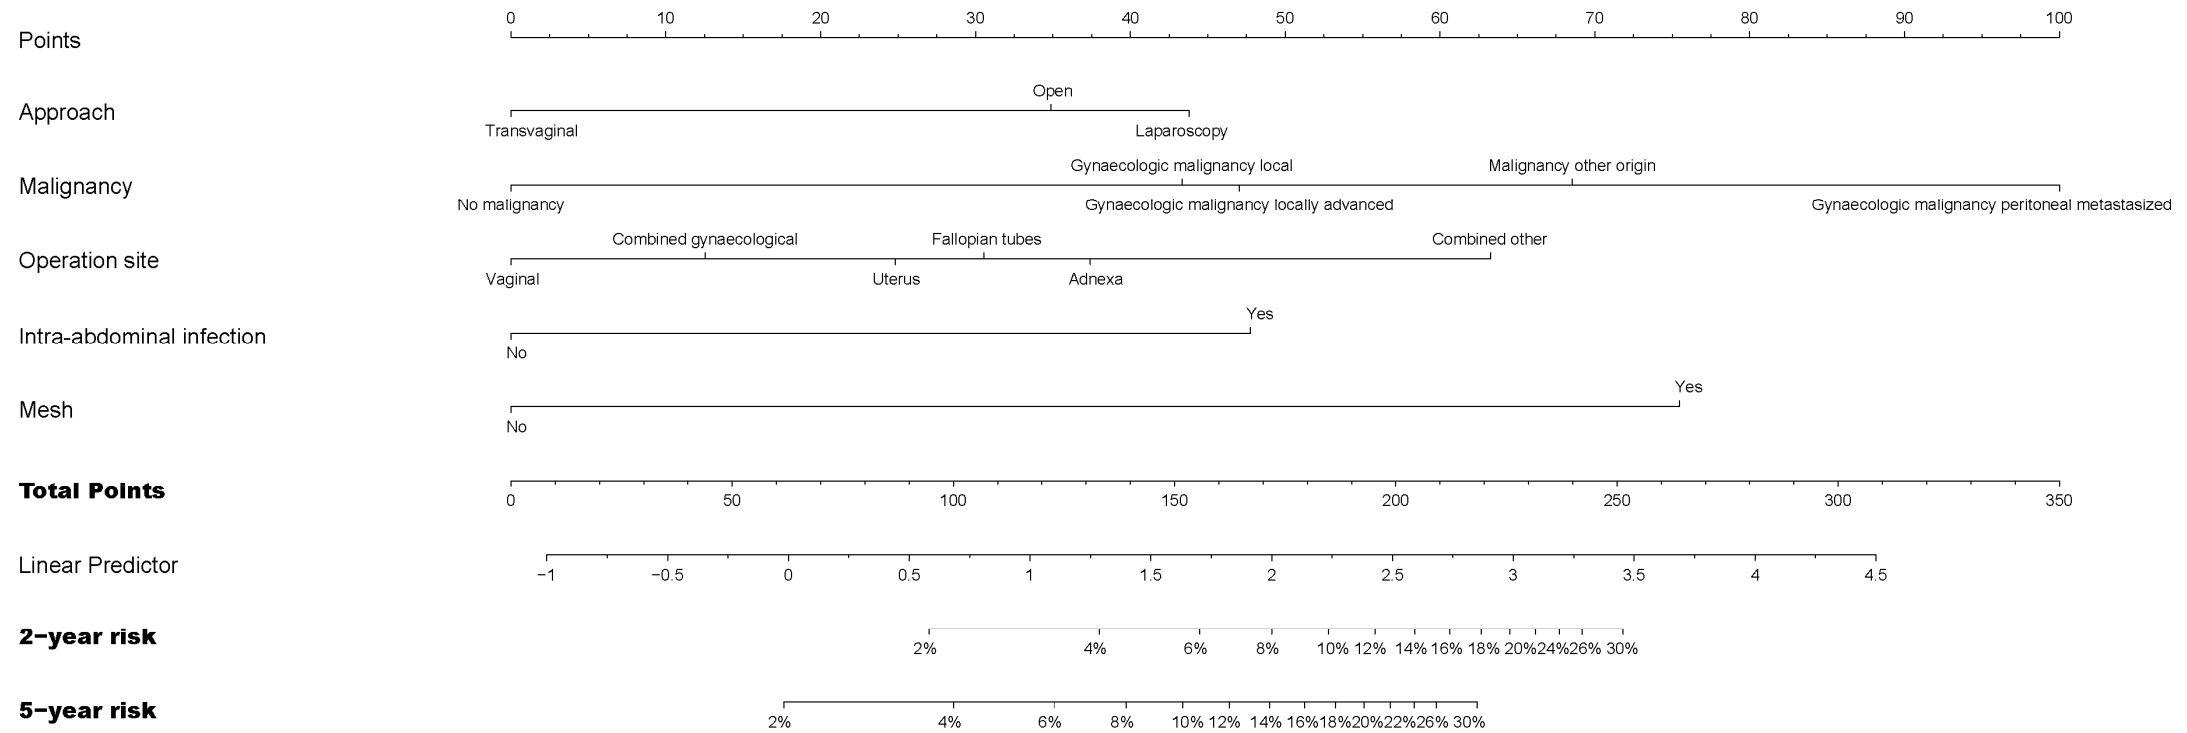

**Figure S2:** Nomogram to predict readmission possibly related to adhesions in woman who underwent initial hysterectomy.

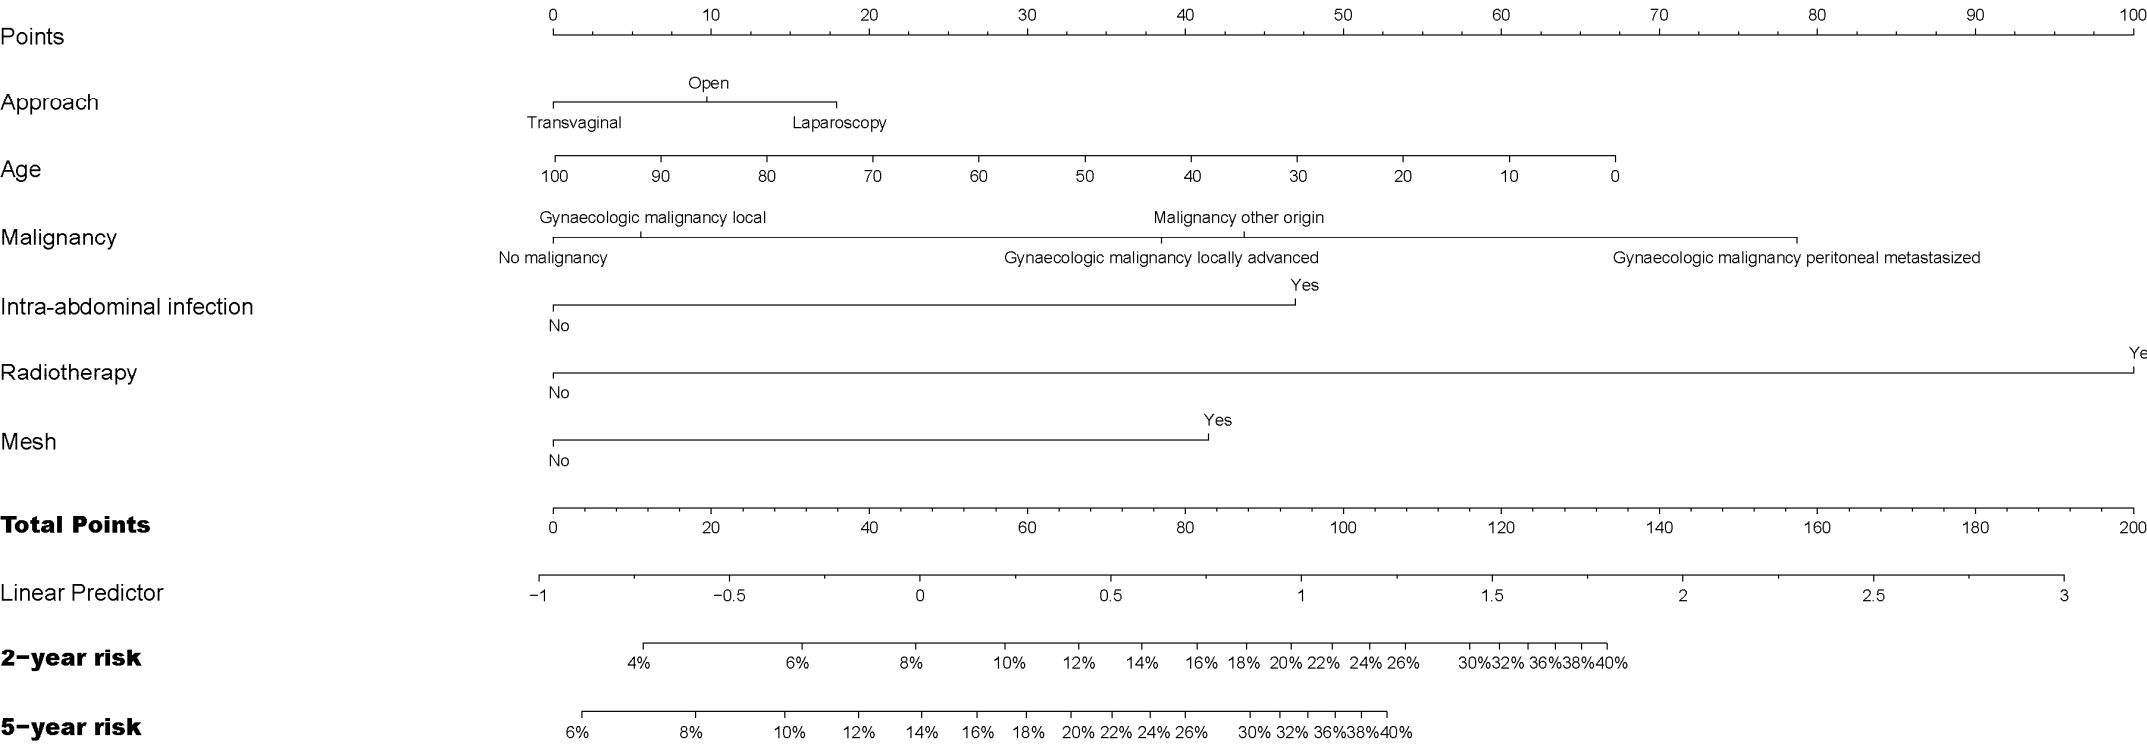



Figure S3: Nomogram to predict reoperation in woman who underwent initial hysterectomy.

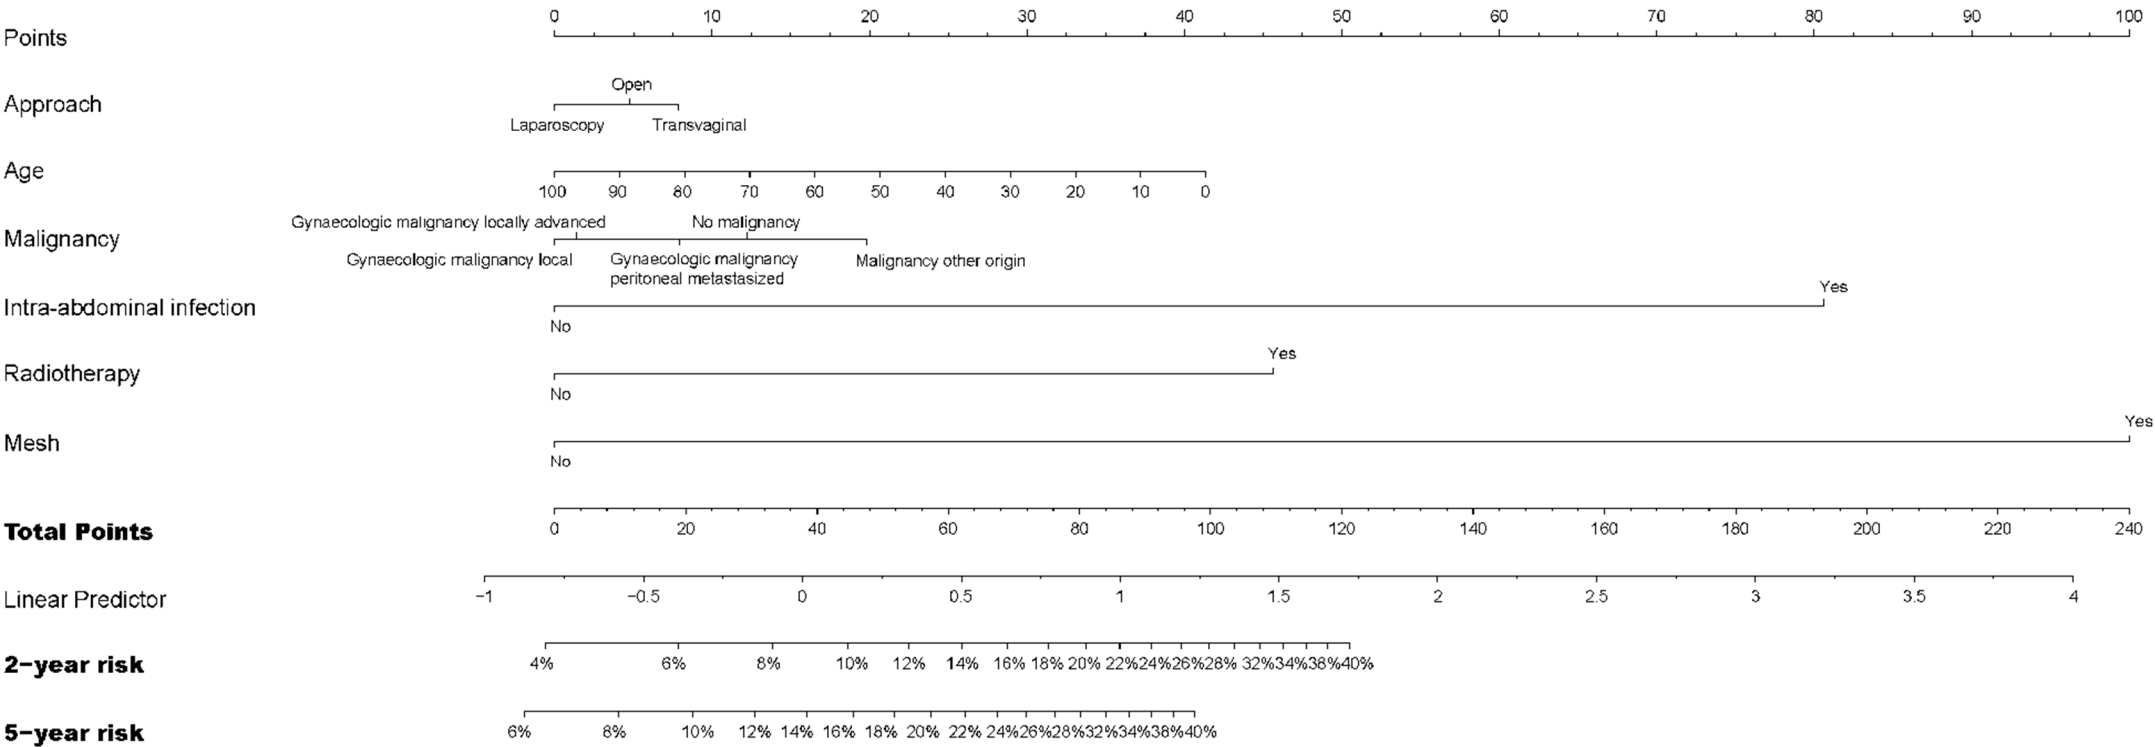

Supplement: s1 [file s1]
